# Supplementary material
Source: PubMed Central journal article supplement (PMC1617161)
Supplement: rsbl20050309s06.pdf [file rsbl20050309s06.pdf]

# **ELECTRONIC APPENDIX**

This is the Electronic Appendix to the article  
Changes in Fish Chorusing Following Hurricane Charley

by

James V. Locascio and David A. Mann

*Biol. Lett.* (doi:10.1098/rsbl.2005.3009)

Electronic appendices are refereed with the text; however, no attempt is made  
to impose a uniform editorial style on the electronic appendices.

Guide to Supplementary Audio Files – Locascio & Mann paper 04BL0402

S1.) File Name: AudioS1\_Locascio&Mann (.wav 52.7KB)

Title: Individual sand seatrout calls.

Text Summary: This underwater audio, recorded in Charlotte Harbor, Fl., contains individual calling sand seatrout (*Cynoscion arenarius*). The distinct “purring” sound produced by the male is used for courting females.

S2.) File Name: AudioS2\_Locascio&Mann (.wav 88.4KB)

Title: Underwater sounds of Hurricane Charley.

Text Summary: This underwater audio was recorded during Hurricane Charley’s advance through Charlotte Harbor, Florida on August 13, 2004.

S3.) File Name: AudioS3\_Locascio&Mann (.wav 38.3KB)

Title: Large chorusing aggregation of sand seatrout.

Text Summary: This underwater audio, recorded in Charlotte Harbor, Fl., is of a large chorusing group of sand seatrout (*Cynoscion arenarius*). Because reproductive efforts and outcomes are maximized by group spawning, large aggregations of calling males form to entice females to join in.
